# Supplementary material for: A Genome-Wide Linkage and Association Scan Reveals Novel Loci for Hypertension and Blood Pressure Traits
Source: PubMed Central journal article supplement (PMC3286457; doi:10.1371/journal.pone.0031489), 2012-02-24
Supplement: pone.0031489.s010.pdf [file pone.0031489.s010.pdf]

Table S2. Strongest associations obtained from both within and total tests for DBP, SBP and MAP, sorted by P value

| Trait | Within family test |     |              |           |                       | Total family test |     |              |           |                       |
|-------|--------------------|-----|--------------|-----------|-----------------------|-------------------|-----|--------------|-----------|-----------------------|
|       | SNP                | Chr | Minor allele | Beta mmHg | <i>P</i>              | SNP               | Chr | Minor allele | Beta mmHg | <i>P</i>              |
| DBP   | rs4463623          | 1   | C            | 8.93      | $1.00 \times 10^{-6}$ | rs4686340         | 3   | C            | -10.14    | $1.00 \times 10^{-6}$ |
|       | rs6596140          | 5   | C            | -9.77     | $1.00 \times 10^{-6}$ | rs2075514         | 16  | T            | 5.78      | $2.00 \times 10^{-6}$ |
|       | rs4434808          | 1   | C            | 8.93      | $3.00 \times 10^{-6}$ | rs9325113         | 5   | C            | 7.80      | $7.00 \times 10^{-6}$ |
|       | rs12930697         | 16  | A            | -6.96     | $5.00 \times 10^{-6}$ | rs16921974        | 8   | T            | -11.88    | $7.00 \times 10^{-6}$ |
|       | rs1387343          | 1   | T            | -7.73     | $8.00 \times 10^{-6}$ | rs7294593         | 12  | G            | 5.11      | $9.00 \times 10^{-6}$ |
|       | rs11644632         | 16  | G            | -6.96     | $8.00 \times 10^{-6}$ | rs7964689         | 12  | T            | 5.11      | $9.00 \times 10^{-6}$ |
|       | rs1550823          | 16  | G            | -6.96     | $8.00 \times 10^{-6}$ | rs8049367         | 16  | C            | -4.78     | $1.20 \times 10^{-5}$ |
|       | rs3012719          | 9   | C            | 10.89     | $9.00 \times 10^{-6}$ | rs11574484        | 15  | T            | 6.53      | $1.30 \times 10^{-5}$ |
|       | rs1410542          | 9   | T            | 8.87      | $1.00 \times 10^{-5}$ | rs1044581         | 15  | T            | 6.53      | $1.40 \times 10^{-5}$ |
|       | rs1037109          | 16  | C            | -6.96     | $1.00 \times 10^{-5}$ | rs1899025         | 2   | A            | -5.02     | $1.80 \times 10^{-5}$ |
| SBP   | rs6596140          | 5   | C            | -11.97    | $3.00 \times 10^{-6}$ | rs887506          | 14  | C            | -11.42    | $5.00 \times 10^{-6}$ |
|       | rs10981664         | 9   | C            | -13.87    | $1.70 \times 10^{-5}$ | rs10886918        | 10  | G            | -6.13     | $1.90 \times 10^{-5}$ |
|       | rs6800495          | 3   | G            | 11.19     | $1.80 \times 10^{-5}$ | rs10830452        | 11  | A            | 6.01      | $2.40 \times 10^{-5}$ |
|       | rs4463623          | 1   | C            | 10.68     | $2.00 \times 10^{-5}$ | rs11026055        | 11  | G            | 8.15      | $4.32 \times 10^{-5}$ |
|       | rs4434808          | 1   | C            | 10.68     | $2.20 \times 10^{-5}$ | rs4574921         | 9   | T            | -6.33     | $4.71 \times 10^{-5}$ |
|       | rs11644632         | 16  | G            | -8.89     | $2.20 \times 10^{-5}$ | rs12333           | 15  | C            | -10.84    | $4.98 \times 10^{-5}$ |
|       | rs2401383          | 9   | C            | -13.87    | $2.30 \times 10^{-5}$ | rs9955776         | 18  | G            | -6.17     | $4.98 \times 10^{-5}$ |
|       | rs2147445          | 1   | C            | -12.12    | $2.60 \times 10^{-5}$ | rs4530357         | 2   | C            | -5.93     | $5.04 \times 10^{-5}$ |
|       | rs12930697         | 16  | A            | -8.89     | $2.60 \times 10^{-5}$ | rs2456015         | 15  | A            | -10.84    | $5.28 \times 10^{-5}$ |
|       | rs1550823          | 16  | G            | -8.89     | $2.60 \times 10^{-5}$ | rs4941229         | 18  | T            | -5.83     | $5.60 \times 10^{-5}$ |
| MAP   | rs6596140          | 5   | C            | -9.24     | $1.00 \times 10^{-6}$ | rs4686340         | 3   | C            | -10.86    | $3.00 \times 10^{-6}$ |
|       | rs1867087          | 17  | T            | 9.16      | $4.00 \times 10^{-6}$ | rs2714017         | 17  | C            | -5.41     | $9.00 \times 10^{-6}$ |
|       | rs11644632         | 16  | G            | -7.24     | $5.00 \times 10^{-6}$ | rs2713989         | 17  | T            | -5.37     | $9.00 \times 10^{-6}$ |
|       | rs12930697         | 16  | A            | -7.24     | $6.00 \times 10^{-6}$ | rs284113          | 1   | T            | -5.04     | $1.10 \times 10^{-5}$ |
|       | rs16933533         | 12  | C            | 7.95      | $7.00 \times 10^{-6}$ | rs12948247        | 17  | T            | -5.41     | $1.10 \times 10^{-5}$ |
|       | rs1550823          | 16  | G            | -7.24     | $7.00 \times 10^{-6}$ | rs737006          | 20  | A            | -19.70    | $1.20 \times 10^{-5}$ |
|       | rs6665157          | 1   | G            | 6.92      | $8.00 \times 10^{-6}$ | rs2714016         | 17  | C            | -5.41     | $1.40 \times 10^{-5}$ |
|       | rs4987082          | 17  | A            | -8.63     | $8.00 \times 10^{-6}$ | rs4689408         | 4   | C            | -5.82     | $1.50 \times 10^{-5}$ |
|       | rs1037109          | 16  | C            | -7.24     | $9.00 \times 10^{-6}$ | rs2296596         | 10  | A            | -6.95     | $1.70 \times 10^{-5}$ |
|       | rs6596142          | 5   | A            | -8.93     | $1.00 \times 10^{-5}$ | rs16921974        | 8   | T            | -13.02    | $1.80 \times 10^{-5}$ |

Shown is the top 10 SNPs for each independent locus associated with systolic blood pressure, diastolic blood pressure and mean arterial pressure in within- and total- family tests of association. Effect sizes are on the mm Hg scale for increasing copy of the minor allele as estimated
