# Supplementary material for: A Genome-Wide Linkage and Association Scan Reveals Novel Loci for Hypertension and Blood Pressure Traits
Source: PubMed Central journal article supplement (PMC3286457; doi:10.1371/journal.pone.0031489), 2012-02-24
Supplement: pone.0031489.s011.pdf [file pone.0031489.s011.pdf]

Table S3. Relationship of SNPs at 9 significant loci to three blood pressure traits

| SNP ID    | Chr | Position  | Minor allele | MAF   | Trait      | Within-family test |                       | Total-family test |                       |
|-----------|-----|-----------|--------------|-------|------------|--------------------|-----------------------|-------------------|-----------------------|
|           |     |           |              |       |            | Beta               | <i>P</i>              | Beta              | <i>P</i>              |
| rs4463623 | 1   | 186567491 | C            | 0.465 | <b>DBP</b> | 8.93               | $1.00 \times 10^{-6}$ | 2.98              | $5.42 \times 10^{-3}$ |
|           |     |           |              |       | SBP        | 10.68              | $2.00 \times 10^{-5}$ | 5.07              | $6.02 \times 10^{-4}$ |
|           |     |           |              |       | MAP        | 7.97               | $3.40 \times 10^{-5}$ | 4.28              | $2.13 \times 10^{-4}$ |
| rs4434808 | 1   | 186574912 | C            | 0.465 | <b>DBP</b> | 8.93               | $3.00 \times 10^{-6}$ | 2.98              | $6.51 \times 10^{-3}$ |
|           |     |           |              |       | SBP        | 10.68              | $2.20 \times 10^{-5}$ | 5.07              | $7.16 \times 10^{-4}$ |
|           |     |           |              |       | MAP        | 7.97               | $4.00 \times 10^{-5}$ | 4.28              | $1.96 \times 10^{-4}$ |
| rs1387343 | 1   | 186595273 | T            | 0.473 | <b>DBP</b> | -7.73              | $8.00 \times 10^{-6}$ | -2.72             | $7.89 \times 10^{-3}$ |
|           |     |           |              |       | SBP        | -8.80              | $3.11 \times 10^{-4}$ | -4.34             | $2.47 \times 10^{-3}$ |
|           |     |           |              |       | MAP        | -7.13              | $1.38 \times 10^{-4}$ | -4.22             | $1.60 \times 10^{-4}$ |
| rs6596140 | 5   | 133049750 | C            | 0.337 | <b>DBP</b> | -9.77              | $1.00 \times 10^{-6}$ | -2.91             | $7.55 \times 10^{-3}$ |
|           |     |           |              |       | SBP        | -11.97             | $3.00 \times 10^{-6}$ | -2.74             | $7.85 \times 10^{-2}$ |
|           |     |           |              |       | MAP        | -9.24              | $1.00 \times 10^{-6}$ | -2.02             | $8.00 \times 10^{-2}$ |
| rs6596142 | 5   | 133049839 | A            | 0.378 | <b>DBP</b> | -9.21              | $1.20 \times 10^{-5}$ | -2.59             | $2.01 \times 10^{-2}$ |
|           |     |           |              |       | SBP        | -10.76             | $5.27 \times 10^{-5}$ | -2.74             | $1.03 \times 10^{-1}$ |
|           |     |           |              |       | MAP        | -8.93              | $1.00 \times 10^{-5}$ | -1.75             | $1.50 \times 10^{-1}$ |
| rs9325113 | 5   | 148078196 | C            | 0.086 | <b>DBP</b> | 8.13               | $1.57 \times 10^{-3}$ | 7.80              | $7.00 \times 10^{-6}$ |
|           |     |           |              |       | SBP        | 12.71              | $1.37 \times 10^{-4}$ | 9.40              | $9.68 \times 10^{-5}$ |
|           |     |           |              |       | MAP        | 9.58               | $1.16 \times 10^{-3}$ | 7.57              | $1.26 \times 10^{-4}$ |
| rs2075514 | 16  | 15780110  | T            | 0.294 | <b>DBP</b> | 6.43               | $3.97 \times 10^{-3}$ | 5.78              | $2.00 \times 10^{-6}$ |

|            |    |          |   |       |            |       |                       |       |                       |
|------------|----|----------|---|-------|------------|-------|-----------------------|-------|-----------------------|
|            |    |          |   |       | <b>SBP</b> | 6.14  | $3.03 \times 10^{-2}$ | 6.22  | $2.16 \times 10^{-4}$ |
|            |    |          |   |       | <b>MAP</b> | 5.49  | $1.65 \times 10^{-2}$ | 5.44  | $4.47 \times 10^{-5}$ |
| rs12930697 | 16 | 60033003 | A | 0.481 | <b>DBP</b> | -6.96 | $5.00 \times 10^{-6}$ | -2.01 | $3.38 \times 10^{-2}$ |
|            |    |          |   |       | <b>SBP</b> | -8.89 | $2.60 \times 10^{-5}$ | -2.53 | $7.17 \times 10^{-2}$ |
|            |    |          |   |       | <b>MAP</b> | -7.24 | $6.00 \times 10^{-6}$ | -2.48 | $1.95 \times 10^{-2}$ |
| rs1550823  | 16 | 60040317 | G | 0.476 | <b>DBP</b> | -6.96 | $8.00 \times 10^{-6}$ | -2.02 | $4.92 \times 10^{-2}$ |
|            |    |          |   |       | <b>SBP</b> | -8.89 | $2.60 \times 10^{-5}$ | -2.57 | $7.72 \times 10^{-2}$ |
|            |    |          |   |       | <b>MAP</b> | -7.24 | $7.00 \times 10^{-6}$ | -2.47 | $2.28 \times 10^{-2}$ |

MAF, minor allele frequency. Beta is the effect size per allele on blood pressure in mm Hg.
